# Supplementary material for: Impacts of soil moisture on de novo monoterpene emissions from European beech, Holm oak, Scots pine, and Norway spruce
Source: Copernicus journal article supplement (doi:10.5194/bg-12-177-2015), 2015-01-09
Supplement: Supplementary file 1 [file bg-12-177-2015-supplement.pdf]

Supplement of Biogeosciences, 12, 177–191, 2015  
<http://www.biogeosciences.net/12/177/2015/>  
doi:10.5194/bg-12-177-2015-supplement  
© Author(s) 2015. CC Attribution 3.0 License.

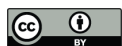

*Supplement of*

## **Impacts of soil moisture on de novo monoterpene emissions from European beech, Holm oak, Scots pine, and Norway spruce**

C. Wu et al.

*Correspondence to:* J. Wildt ([j.wildt@fz-juelich.de](mailto:j.wildt@fz-juelich.de))

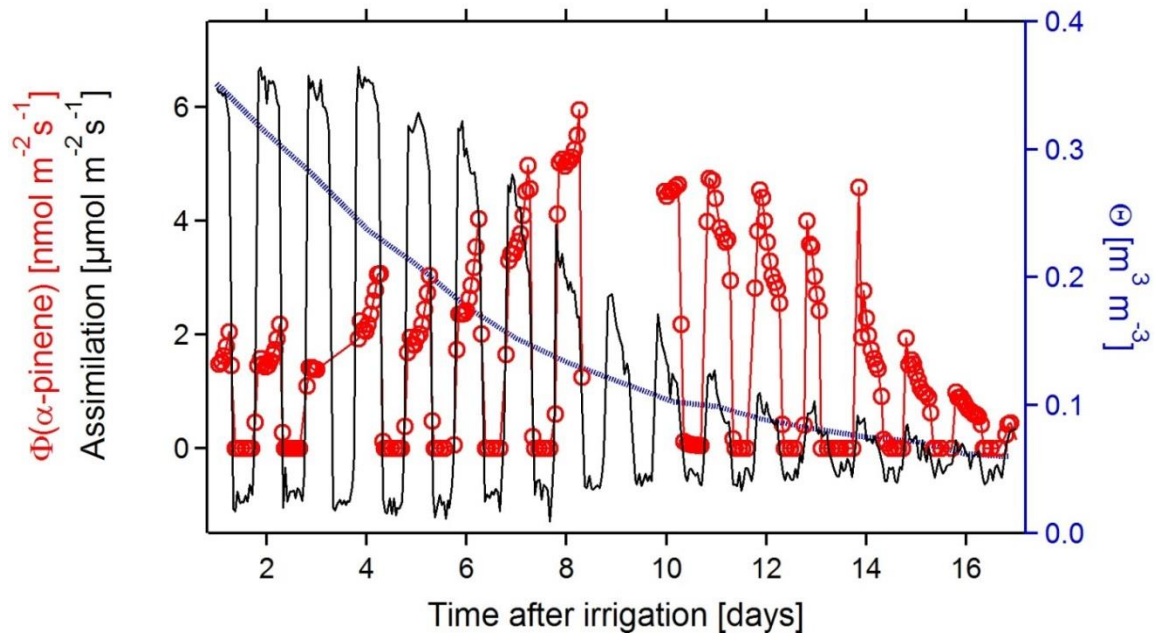

**Fig. S1:** Temporal shape of  $\alpha$ -pinene emissions from Holm oak, experiment 1 (red circles, left hand y scale), net assimilation (black line, left hand y scale, multiplied by -1) and volumetric water content of the soil (blue line right hand y scale). Plant was irrigated at day 0. Gaps in  $\alpha$ -pinene emissions are due to time periods when the GC MS device was switched to calibration.

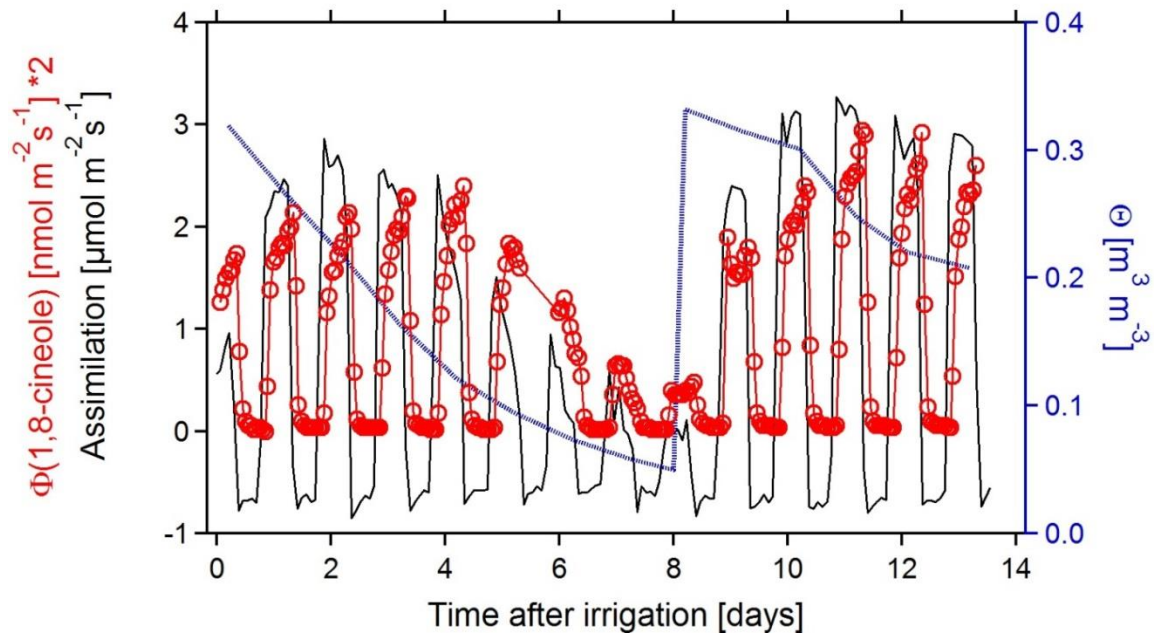

**Fig. S2:** Temporal shape of 1,8-cineole emissions from Scots pine (red circles, left hand y scale, data are multiplied by 2) and net assimilation (black line, left hand y scale, multiplied by -1) and volumetric water content of the soil (blue line right hand y scale). Plant was irrigated at day 0 and re-watered at day 8. Gap in the trace showing  $\alpha$ -pinene emissions is due to a calibration.

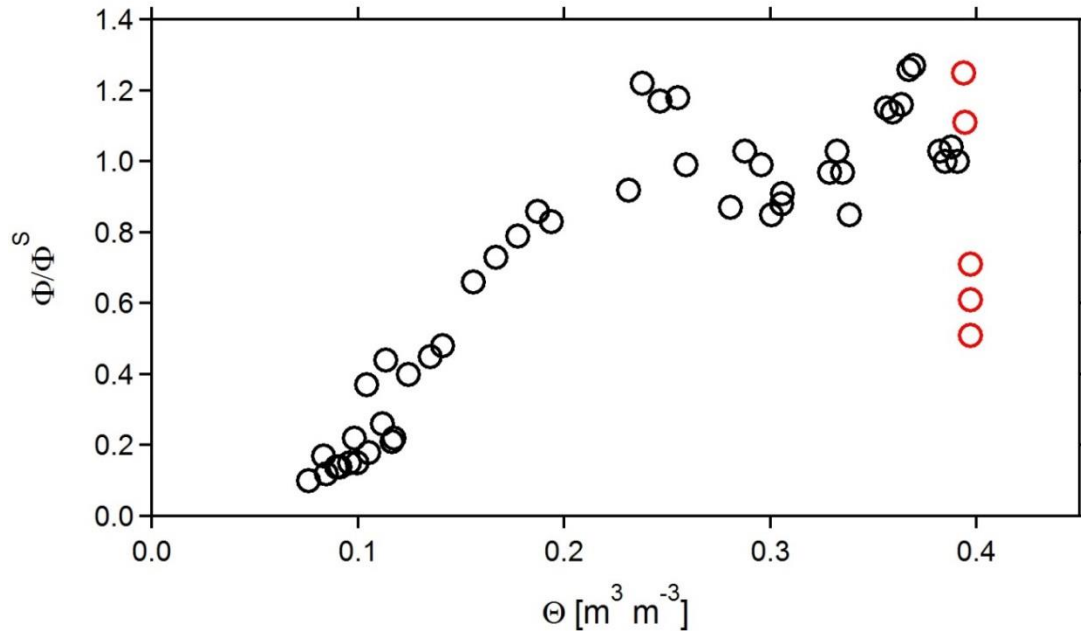

**Fig. S3:** Normalized 1,8-cineole emissions from Norway spruce during a progressing drought period (black circles) and recovery (red circles) in dependence of the volumetric water content of the soil. For transformation to RWC multiply numbers at the x-axis by 2.6.

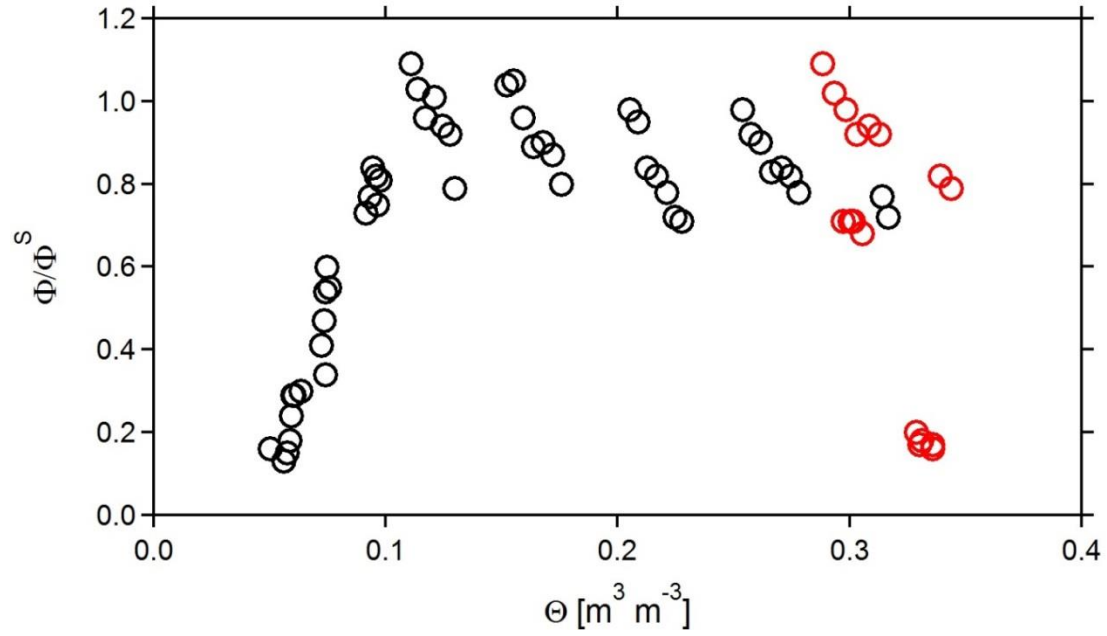

**Fig. S4:** Normalized 1,8-cineole emissions from Scots pine during a progressing drought period (black circles) and recovery (red circles) in dependence of the volumetric water content of the soil. For transformation to RWC multiply numbers at the x-axis by 2.6.
